# Supplementary material
Source: publisher figshare collection journal article supplement (https://acs.figshare.com/ndownloader/files/3897607)
Supplement: Supplementary file 1 [file 3897607]

# Modulation of Complement Activation and Amplification on Nanoparticle Surfaces by Glycopolymer Conformation and Chemistry

*Kai Yu,<sup>†</sup> Benjamin F.L. Lai,<sup>†</sup> Jonathan H. Foley,<sup>§</sup> Michael J. Krisinger,<sup>§,‡</sup> Edward  
M. Conway<sup>§</sup> and Jayachandran N. Kizhakkedathu<sup>†,‡,\*</sup>*

## Supporting Information

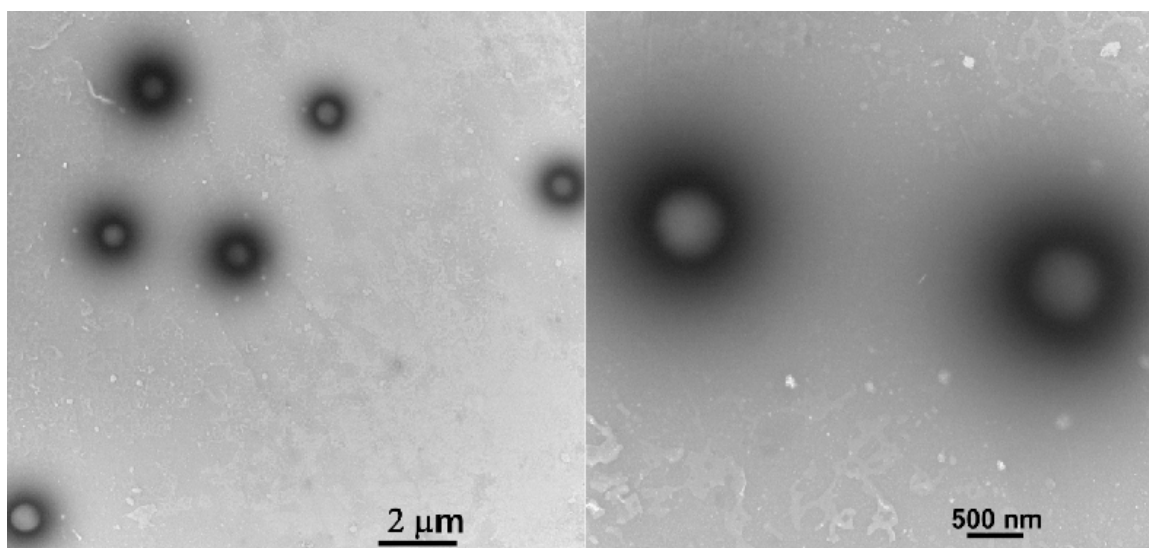

**Figure S1.** TEM images of nanoparticles grafted with glucose-containing polymer, stained by 2% phosphotungstic acid, which subjected to hydrolysis to produce glucose particles with different grafting density (Glc 1 to Glc 6)

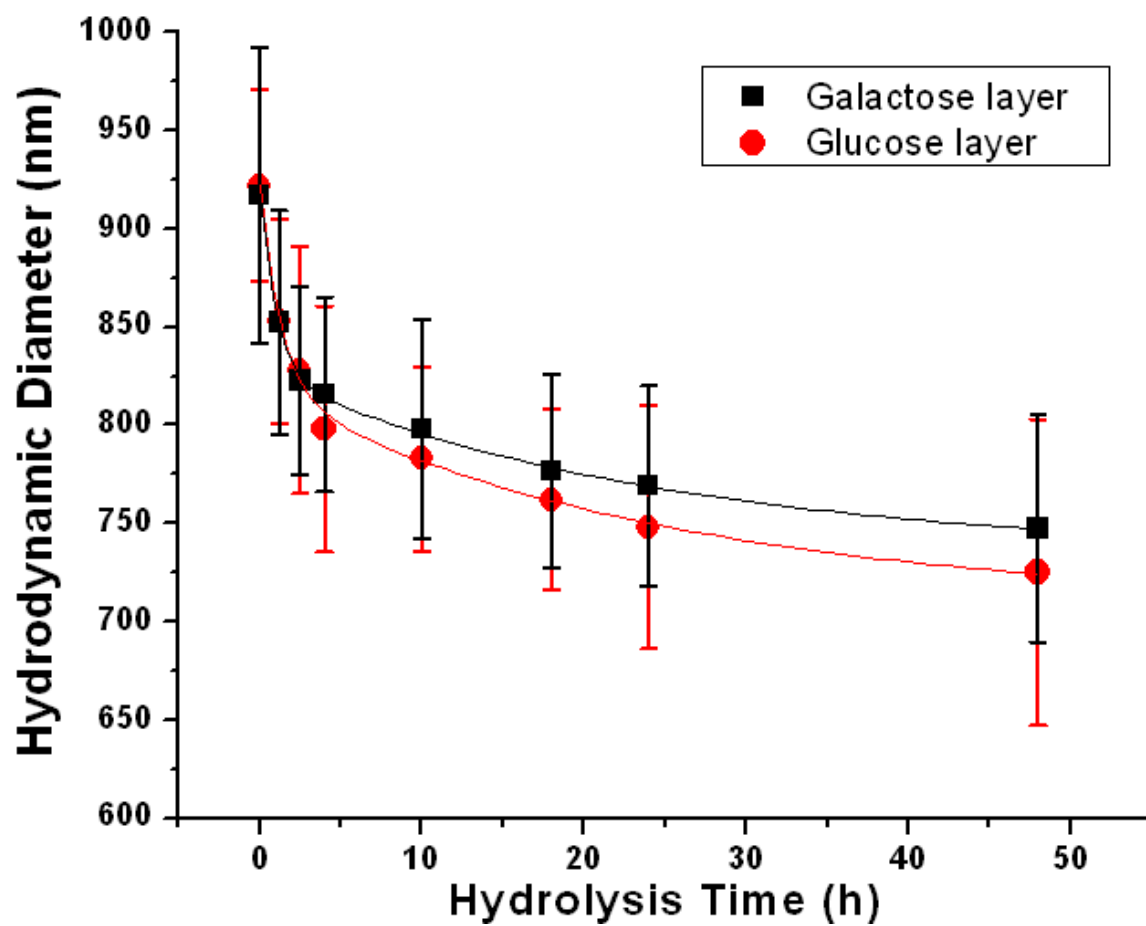

**Figure S2.** Dependence of hydrodynamic diameter of glycopolymer grafted nanoparticles on hydrolysis time.

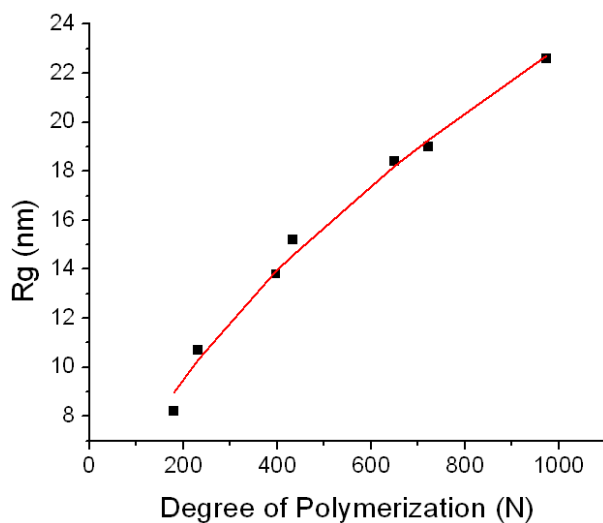

**Figure S3.** Dependence of radius of gyration of glycopolymer chain on degree of polymerization. The data was fitted using  $Rg = aN^{\nu}$ , where the  $\nu$  is derived as the efficient Flory exponent. Glycopolymer (containing galactose residues) having different degree of polymerization (N) was synthesized by ATRP with changing the initiator concentration. The obtained value of efficient Flory exponent is  $0.55 \pm 0.03$ , sitting between 0.5 (corresponding to polymer chain in  $\theta$  solvent) and 0.6 (corresponding to linear polymer chain in good solvent). The result indicates that the polymer is swollen in PBS buffer (0.11 M), but not fully extended.

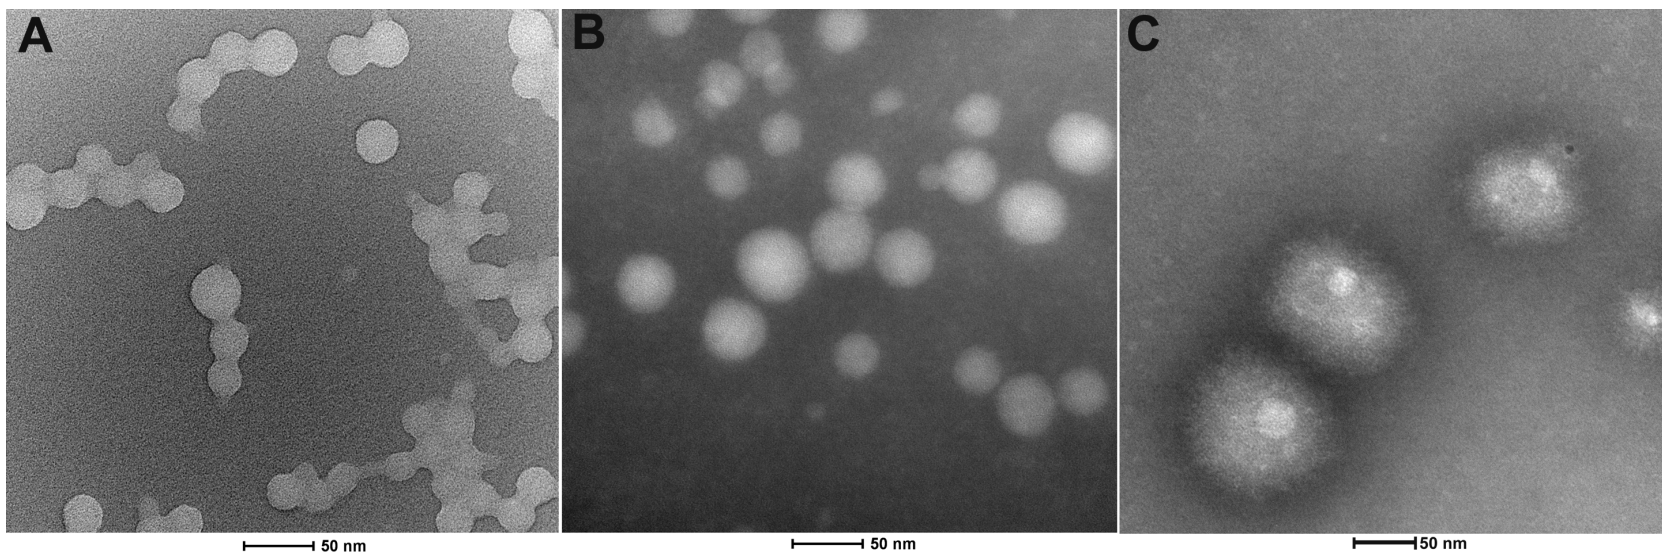

**Figure S4.** TEM images of initiator modified PS nanoparticles stained by 2% phosphotungstic acid ( $33.3 \pm 6.7$  nm) (A), nanoparticles grafted with galactose-containing polymer ( $38.5 \pm 7.3$  nm) with a grafting density of  $0.026$  chains/nm<sup>2</sup> (B), nanoparticles grafted with galactose-containing polymer ( $97.4 \pm 26$  nm) with a grafting density of  $0.17$  chains/nm<sup>2</sup> (C).

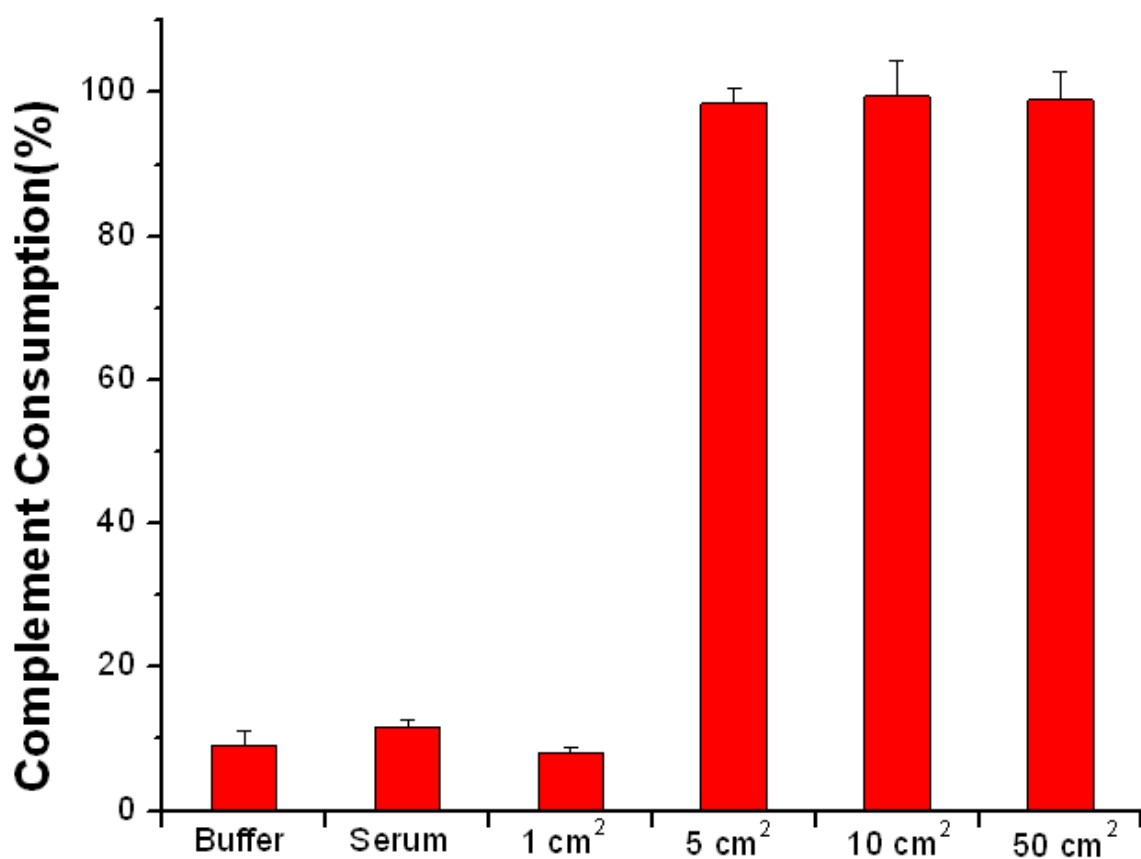

**Figure S5.** Effect of surface area of glycopolymer grafted nanoparticles on complement consumption. Nanoparticles grafted with glucose-containing polymer at a grafting density 0.083 chains/nm<sup>2</sup> were used for this study. Diluted fresh human serum (20%, 180  $\mu$ L) was incubated with NP suspensions (different surface areas, on 669 nm particles) for 1 h at 37°C and the residual total complement activity of the exposed serum was measured using the sheep erythrocyte based hemolytic assay. Each data point represents an average  $\pm$  SD (n = 3) of three experiments (3 donors) in fresh serum.

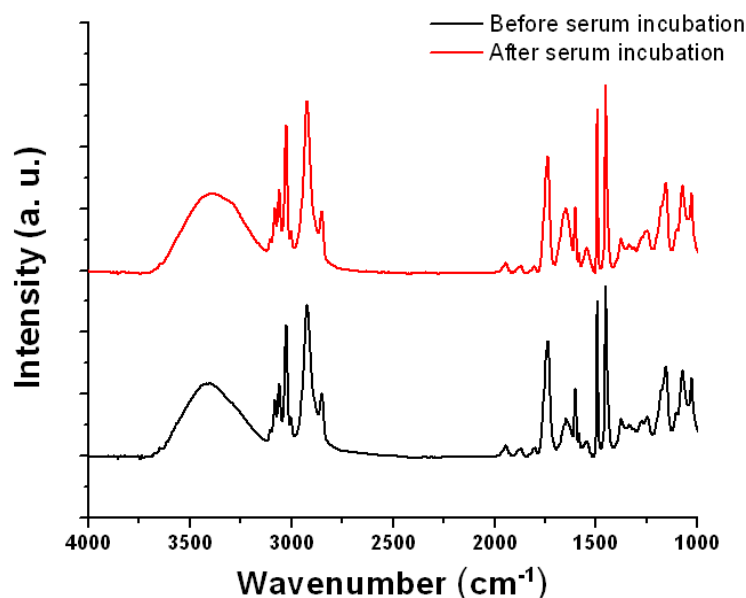

**Figure S6.** IR spectra of nanoparticles grafted with galactose-containing polymer (Galactose NP1) before and after incubation with serum (both spectra were normalized by the carbonyl peak at  $1720\text{ cm}^{-1}$  from the bare particles). Fresh human serum ( $180\text{ }\mu\text{L}$ ) was incubated with  $20\text{ }\mu\text{L}$  of NP (Galactose NP1) suspensions ( $50\text{ cm}^2$ , on  $669\text{ nm}$  particles) for  $1\text{ h}$  at  $37^\circ\text{C}$ . Then the particles were washed by PBS buffer solution twice ( $200\text{ uL}$  each), boiled at  $90\text{ }^\circ\text{C}$  with  $2\%$  SDS ( $100\text{ uL}$ ) for  $10\text{ minutes}$ , ultrasonicated in buffer for  $10\text{ min}$ , finally washed with water and dried. Except the increase in the intensity at  $1650\text{ cm}^{-1}$ , correspond to the  $\text{C}=\text{O}$  stretching vibration of the amide group due to the chemically fixation of complement  $\text{C3}$ ,<sup>1</sup> there is no noticeable change of IR intensity. The consistent IR band intensity from  $3600\text{ to }3200\text{ cm}^{-1}$ , which is due to  $\text{O}-\text{H}$  stretch in the glycopolymer, imply that there is no hydrolysis during incubation.

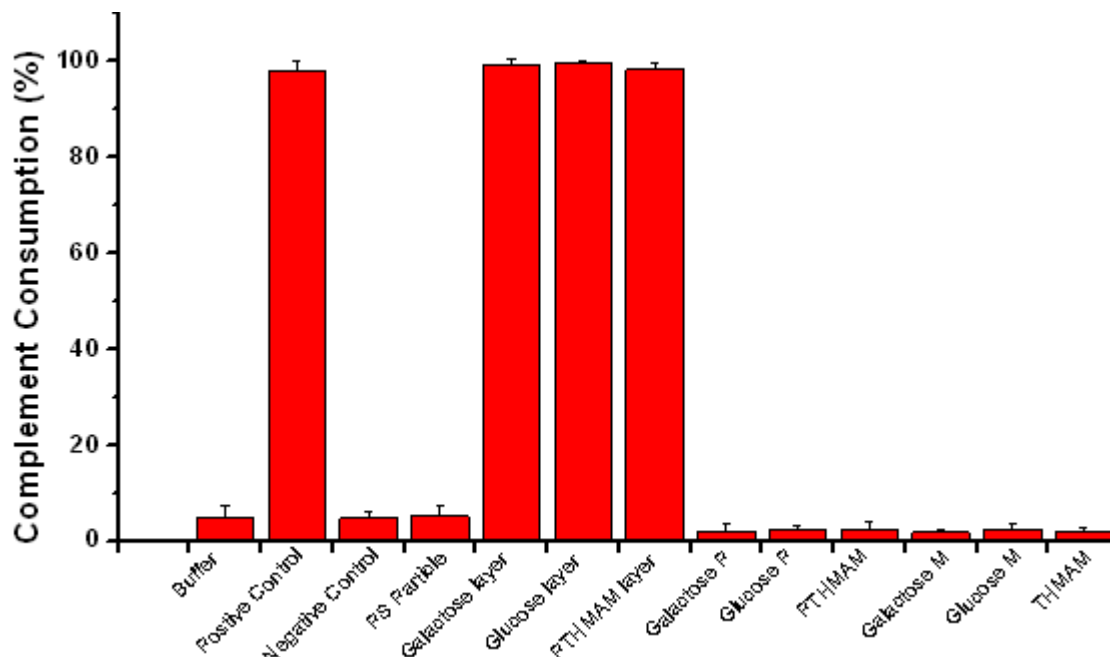

**Figure S7.** Complement consumption induced by bare PS particles, particles grafted glycopolymer (galactose layer, glucose layer) and control polymer (PTHMAM layer), soluble glycopolymer (Galactose P and glucose P) and PTHMAM, carbohydrate monomer (galactose M and glucose M) and control monomer (THMAM). IgG (5mg/mL) as a positive control. GVB-EDTA (1 mM) as a negative control. Diluted fresh human serum (20%, 180  $\mu$ L) was incubated with 20  $\mu$ L of NP suspensions (50 cm<sup>2</sup>, on 669 nm particles) or 20  $\mu$ L polymer solution (6.1 mg/mL) or 20  $\mu$ L monomer solution (6.1 mg/mL) for 1 h at 37°C. The residual total complement activity of the exposed serum was measured using the sheep erythrocyte based hemolytic assay. Each data point represents an average  $\pm$  SD (n = 3) of three experiments (3 donors) in fresh serum.

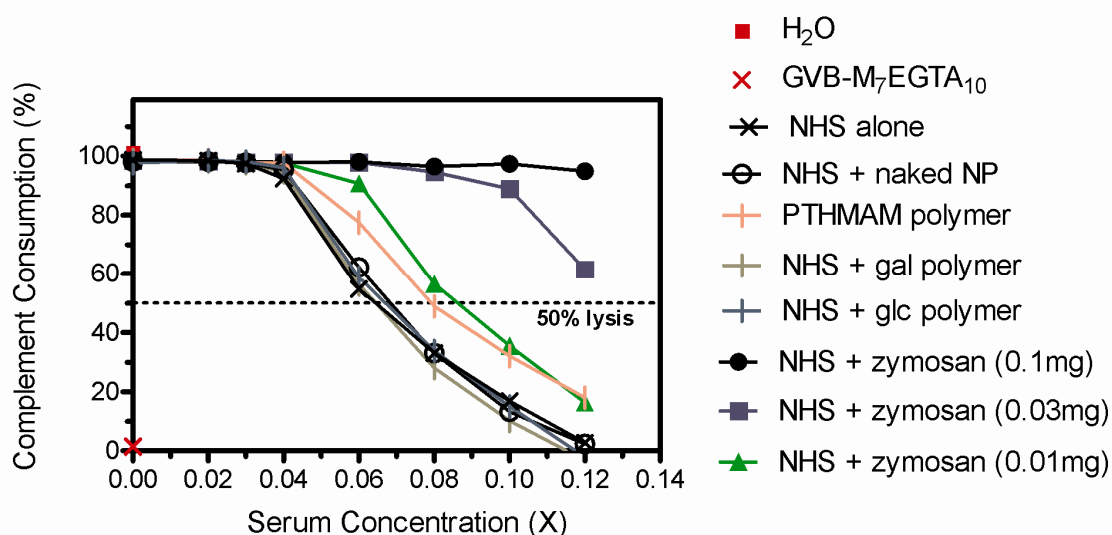

**Figure S8.** Effect of complement consumption measured by rabbit erythrocyte lysis upon incubation with zymosan, glycopolymer containing galactopyranoside or glucopyranoside and PTHMAM at different dilutions of human serum. Pooled human serum (150  $\mu$ L) was incubated with zymosan (0.01, 0.03, 0.1 mg) for 1 h at 37°C and the residual complement activity of the exposed serum was measured using the rabbit erythrocyte based hemolytic assay at different serum concentrations. Results are representative of 2 independent experiments, each with similar results.

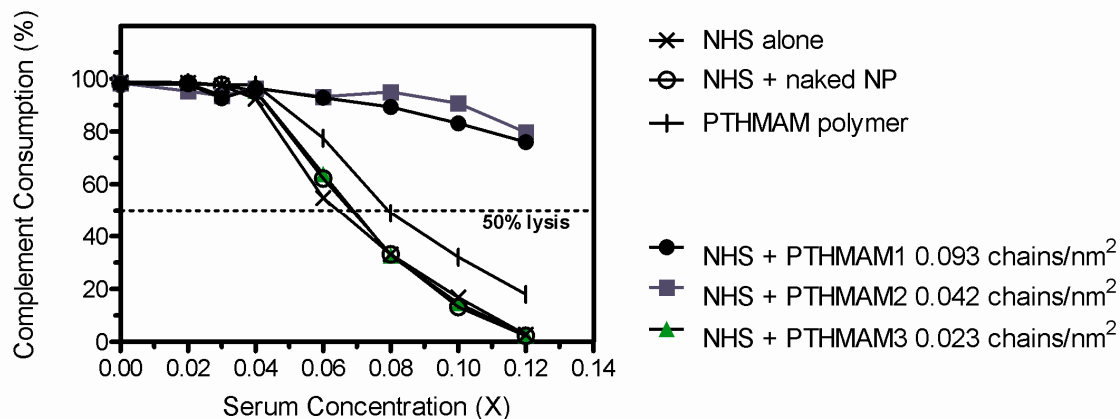

**Figure S9.** Effect of complement consumption measured by rabbit erythrocyte lysis upon incubation with particles grafted with PTHMAM at different concentrations of human serum. Pooled human serum (150  $\mu$ L) was incubated with 100  $\mu$ L of NPs suspension (150  $\text{cm}^2$ , on 669 nm particles) for 1 h at 37°C and the residual complement activity of the exposed serum was measured using the rabbit erythrocyte based hemolytic assay at different serum concentrations. Zymosan and GVB-CM (GVB containing 0.15 mM  $\text{Ca}^{2+}$  and 1 mM  $\text{Mg}^{2+}$ ) were used as positive and negative controls. Results are representative of 2 independent experiments, each with similar results.

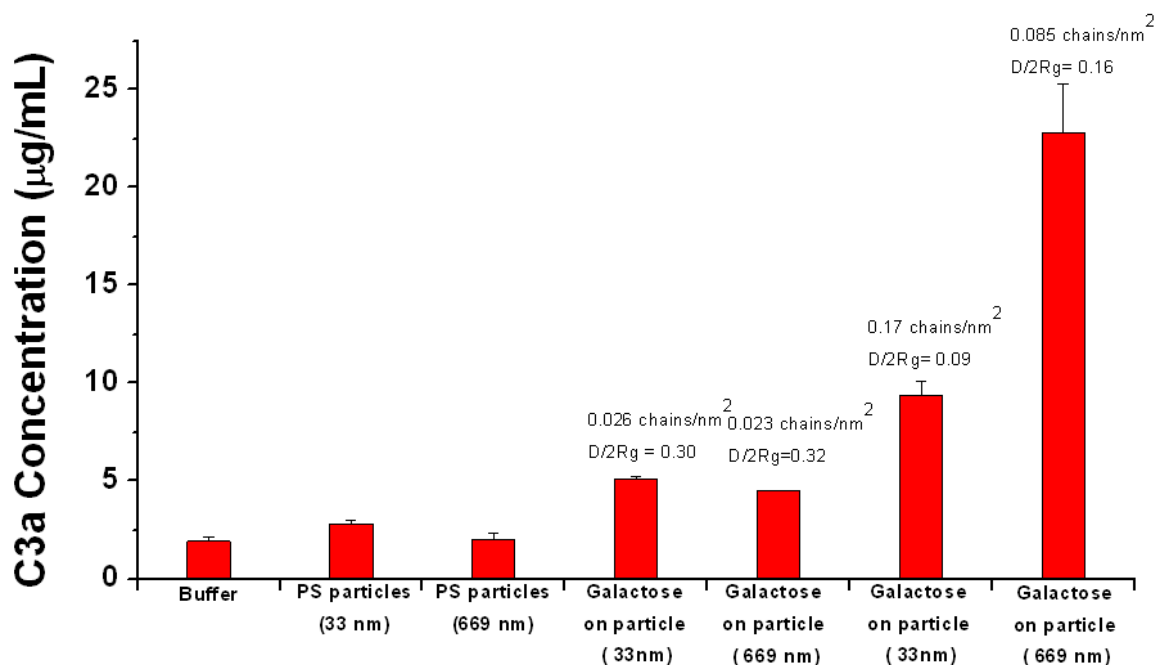

**Figure S10.** Effect of particle size (surface curvature) on the generation of C3a. Fresh human serum (180 µL) was incubated with 20 µL of NP suspensions (50 cm<sup>2</sup>, on 33 and 669 nm particles) for 1 h at 37°C. C3a levels in the serum were quantified by Microvue C3a Plus ELISA. Each data point represents an average  $\pm$  SD (n = 3) of concentration of complement activation product C3a generated in fresh serum.

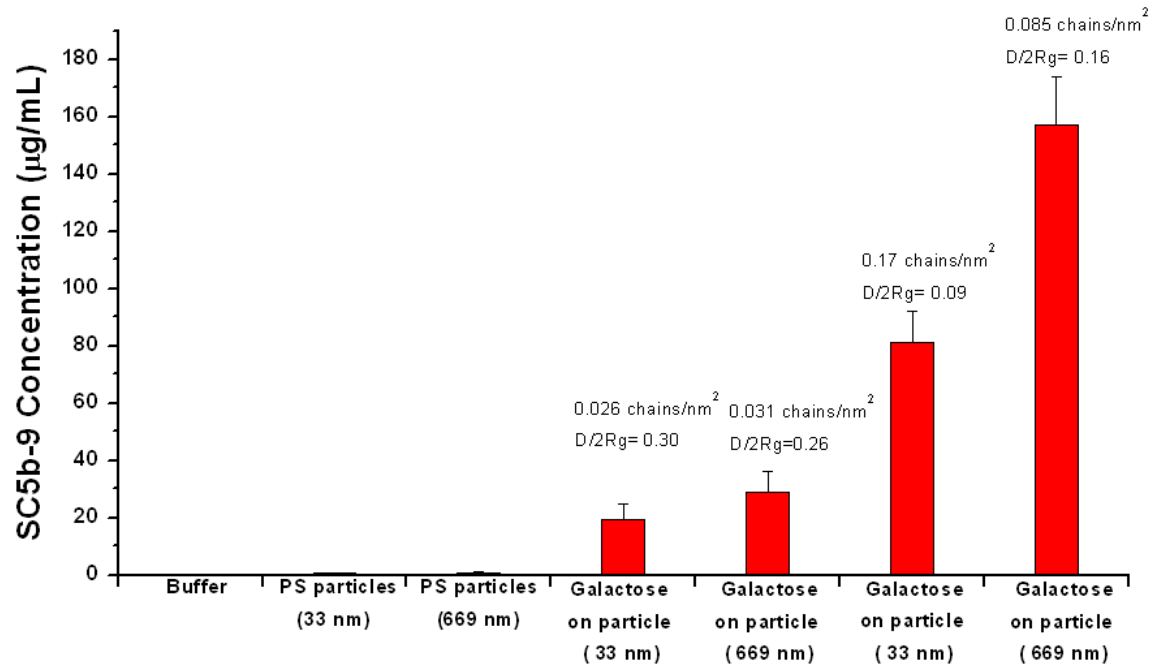

**Figure S11.** Effect of particle size (surface curvature) on the generation of SC5b-9. Fresh human serum (180 µL) was incubated with 20 µL of NP suspensions (50 cm<sup>2</sup>, on 33 and 669 nm particles) for 1 h at 37°C. SC5b-9 levels in the serum were quantified by MicroVue SC5b-9 Plus ELISA. Each data point represents an average ± SD (n = 3) of concentration of complement activation product SC5b-9 generated in fresh serum.

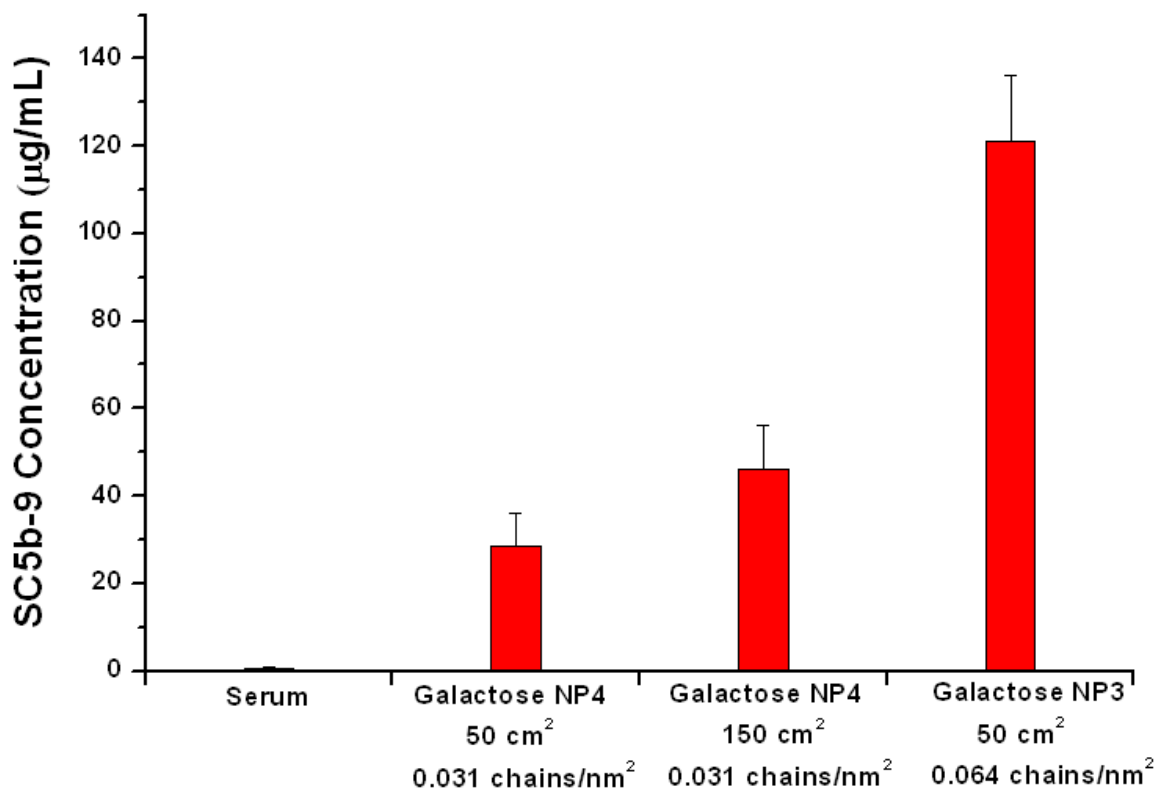

**Figure S12.** Effect of surface area of glycopolymer grafted nanoparticles on the generation of SC5b-9. Nanoparticles grafted with galactose-containing polymer with grafting densities of 0.031 and 0.064 chains/nm<sup>2</sup> were used for this study. Fresh human serum (180 µL) was incubated with 20 µL of NP suspensions (50 and 150 cm<sup>2</sup>, on 669 nm particles) for 1 h at 37°C. SC5b-9 levels in the serum were quantified by MicroVue SC5b-9 Plus ELISA. Each data point represents an average  $\pm$  SD ( $n = 3$ ) of concentration of complement activation product SC5b-9 generated in fresh serum.

**Table S1.** Characteristics of PTHMAM brush grafted NPs

|                                            | <b>PTHMAM NP1</b> | <b>PTHMAM NP2</b> | <b>PTHMAM NP3</b> |
|--------------------------------------------|-------------------|-------------------|-------------------|
| Hydrodynamic size                          | 804 ± 55 nm       | 769 ± 67 nm       | 749.2 ± 43 nm     |
| Grafting density (chains/nm <sup>2</sup> ) | 0.093             | 0.042             | 0.023             |
| D/2R <sub>g</sub>                          | 0.16              | 0.24              | 0.33              |

The molecular weight of the grafted PTHMAM was 72000 (PDI =1.3). The error estimate for the grafting density calculation is less than 20% of the mean value.

**Table S2.** List of proteins detected in the corona on the Galactose-containing glycopolymer layer with grafting density 0.064 chains/nm<sup>2</sup>

| Accession number | Protein                                    | emPAI | Abundance (%) |
|------------------|--------------------------------------------|-------|---------------|
| P01024           | Complement C3                              | 16.25 | 19.20         |
| P02647           | Apolipoprotein A-I                         | 7.64  | 9.03          |
| P02649           | Apolipoprotein E                           | 5.26  | 6.21          |
| P02768           | Serum albumin                              | 4.06  | 4.80          |
| P02654           | Apolipoprotein C-I                         | 3.89  | 4.60          |
| P02748           | Complement component C9                    | 3.22  | 3.80          |
| P0DJ18           | Serum amyloid A-1 protein                  | 2.85  | 3.37          |
| P06727           | Apolipoprotein A-IV                        | 2.54  | 3.00          |
| B0YIW2           | Apolipoprotein C-III                       | 2.25  | 2.66          |
| P02652           | Apolipoprotein A-II                        | 1.89  | 2.23          |
| P01031           | Complement C5                              | 1.69  | 2.00          |
| P01857           | Ig gamma-1 chain C region                  | 1.59  | 1.88          |
| P10909-2         | Isoform 2 of Clusterin                     | 1.4   | 1.65          |
| P04264           | Keratin, type II cytoskeletal 1            | 1.28  | 1.51          |
| P04004           | Vitronectin                                | 1.25  | 1.48          |
| P01834           | Ig kappa chain C region                    | 1.16  | 1.37          |
| P01625           | Ig kappa chain V-IV region Len             | 1.04  | 1.23          |
| P01764           | Ig heavy chain V-III region VH26           | 1.04  | 1.23          |
| P07360           | Complement component C8 gamma chain        | 1.01  | 1.19          |
| P13671           | Complement component C6                    | 0.98  | 1.16          |
| P01766           | Ig heavy chain V-III region BRO            | 0.98  | 1.16          |
| P13645           | Keratin, type I cytoskeletal 10            | 0.92  | 1.09          |
| P00734           | Prothrombin                                | 0.88  | 1.04          |
| F8W6P5           | LVV-hemorphin-7                            | 0.85  | 1.00          |
| P01859           | Ig gamma-2 chain C region                  | 0.84  | 0.99          |
| P02766           | Transthyretin                              | 0.78  | 0.92          |
| P10643           | Complement component C7                    | 0.7   | 0.83          |
| P0CG05           | Ig lambda-2 chain C regions                | 0.69  | 0.82          |
| F5GY80           | Complement component C8 beta chain         | 0.68  | 0.80          |
| Q96IY4           | Carboxypeptidase B2                        | 0.68  | 0.80          |
| G3V1N2           | HCG1745306, isoform CRA_a                  | 0.66  | 0.78          |
| P01593           | Ig kappa chain V-I region                  | 0.65  | 0.77          |
| Q0VAC5           | HP protein                                 | 0.63  | 0.74          |
| P35527           | Keratin, type I cytoskeletal 9             | 0.59  | 0.70          |
| P01860           | Ig gamma-3 chain C region                  | 0.57  | 0.67          |
| P01871-2         | Isoform 2 of Ig mu chain C region          | 0.53  | 0.63          |
| P35542           | Serum amyloid A-4 protein                  | 0.51  | 0.60          |
| G3V3A0           | Alpha-1-antichymotrypsin                   | 0.49  | 0.58          |
| I3L1H9           | Zymogen granule protein 16 homolog B       | 0.48  | 0.57          |
| P02790           | Hemopexin                                  | 0.44  | 0.52          |
| P35908           | Keratin, type II cytoskeletal 2 epidermal  | 0.41  | 0.48          |
| P07357           | Complement component C8 alpha chain        | 0.4   | 0.47          |
| Q99969           | Retinoic acid receptor responder protein 2 | 0.39  | 0.46          |
| P04259           | Keratin, type II cytoskeletal 6B           | 0.38  | 0.45          |

|          |                                                             |      |      |
|----------|-------------------------------------------------------------|------|------|
| P02538   | Keratin, type II cytoskeletal 6A                            | 0.38 | 0.45 |
| P02533   | Keratin, type I cytoskeletal 14                             | 0.36 | 0.43 |
| B1AKG0   | Complement factor H-related 1                               | 0.35 | 0.41 |
| E7EPG1   | Multimerin-1                                                | 0.33 | 0.39 |
| P05109   | Protein S100-A8                                             | 0.32 | 0.38 |
| P12259   | Coagulation factor V                                        | 0.31 | 0.37 |
| P04196   | Histidine-rich glycoprotein                                 | 0.3  | 0.35 |
| P02655   | Apolipoprotein C-II                                         | 0.3  | 0.35 |
| P13647   | Keratin, type II cytoskeletal 5                             | 0.29 | 0.34 |
| Q13103   | Secreted phosphoprotein 24                                  | 0.29 | 0.34 |
| B4E1Z4   | Complement factor B                                         | 0.28 | 0.33 |
| J3KN47   | Serotransferrin                                             | 0.28 | 0.33 |
| F5H1A8   | Gelsolin                                                    | 0.27 | 0.32 |
| P18428   | Lipopolysaccharide-binding protein                          | 0.27 | 0.32 |
| P01008   | Antithrombin-III                                            | 0.27 | 0.32 |
| P01023   | Alpha-2-macroglobulin                                       | 0.22 | 0.26 |
| P07737   | Profilin-1                                                  | 0.22 | 0.26 |
| P10124   | Serglycin                                                   | 0.19 | 0.22 |
| C9JV77   | Alpha-2-HS-glycoprotein                                     | 0.17 | 0.20 |
| Q9Y251   | Heparanase                                                  | 0.17 | 0.20 |
| C9JEX1   | Kininogen-1                                                 | 0.15 | 0.18 |
| Q5VYL6   | Complement factor H-related 5                               | 0.15 | 0.18 |
| P08603   | Complement factor H                                         | 0.14 | 0.17 |
| B0YJC4   | Vimentin                                                    | 0.14 | 0.17 |
| P19652   | Alpha-1-acid glycoprotein 2                                 | 0.14 | 0.17 |
| P27918   | Properdin                                                   | 0.13 | 0.15 |
| P31946-2 | Isoform Short of 14-3-3 protein beta/alpha                  | 0.12 | 0.14 |
| P24593   | Insulin-like growth factor-binding protein 5                | 0.11 | 0.13 |
| F5H5M6   | Hyaluronan-binding protein 2 50 kDa heavy chain             | 0.11 | 0.13 |
| Q5T985   | Inter-alpha (Globulin) inhibitor H2                         | 0.1  | 0.12 |
| P10646   | Tissue factor pathway inhibitor                             | 0.09 | 0.11 |
| B0UZ83   | Complement C4 gamma chain                                   | 0.09 | 0.11 |
| P02766   | Serum paraoxonase/arylesterase 1                            | 0.08 | 0.09 |
| E7EQ48   | Proteoglycan 4                                              | 0.06 | 0.07 |
| P07196   | Neurofilament light polypeptide                             | 0.05 | 0.06 |
| E7EMV2   | Neurofilament medium polypeptide                            | 0.04 | 0.05 |
| P19021-2 | Isoform 2 of Peptidyl-glycine alpha-amidating monooxygenase | 0.03 | 0.04 |
| F8W7G7   | Anastellin                                                  | 0.01 | 0.01 |

The absolute protein abundance in proteomics was estimated with the Exponentially Modified Protein Abundance Index through HCD fragmentation. Protein abundance (mol %) =  $\text{emPAI} / \sum(\text{emPAI}) \times 100$ . Protein score 50 was taken as the identity threshold as the confidence level is higher than 95%.

**Table S3.** List of proteins detected in the corona on the galactose-containing glycopolymer layer with grafting density 0.031 chains/nm<sup>2</sup>

| <b>Accession number</b> | <b>Protein</b>                             | <b>emPAI</b> | <b>Abundance (%)</b> |
|-------------------------|--------------------------------------------|--------------|----------------------|
| P01024                  | Complement C3                              | 12.11        | 13.93                |
| P02647                  | Apolipoprotein A-I                         | 10.75        | 12.37                |
| P02649                  | Apolipoprotein E                           | 6.46         | 7.43                 |
| P02654                  | Apolipoprotein C-I                         | 5.72         | 6.58                 |
| P0DJI8                  | Serum amyloid A-1 protein                  | 2.85         | 3.28                 |
| P06727                  | Apolipoprotein A-IV                        | 2.79         | 3.21                 |
| P02748                  | Complement component C9                    | 2.63         | 3.03                 |
| B0YIW2                  | Apolipoprotein C-III                       | 2.25         | 2.59                 |
| P02768                  | Serum albumin                              | 2.23         | 2.57                 |
| P04264                  | Keratin, type II cytoskeletal 1            | 2.05         | 2.36                 |
| P07360                  | Complement component C8 gamma chain        | 2.05         | 2.36                 |
| P10909-2                | Isoform 2 of Clusterin                     | 1.99         | 2.29                 |
| P00734                  | Prothrombin                                | 1.94         | 2.23                 |
| P01857                  | Ig gamma-1 chain C region                  | 1.38         | 1.59                 |
| P55056                  | Apolipoprotein C-IV                        | 1.28         | 1.47                 |
| Q99969                  | Retinoic acid receptor responder protein 2 | 1.26         | 1.45                 |
| P04004                  | Vitronectin                                | 1.25         | 1.44                 |
| P01031                  | Complement C5                              | 1.23         | 1.42                 |
| P02652                  | Apolipoprotein A-II                        | 1.22         | 1.40                 |
| P02655                  | Apolipoprotein C-II                        | 1.22         | 1.40                 |
| P35527                  | Keratin, type I cytoskeletal 9             | 1.16         | 1.33                 |
| P01834                  | Ig kappa chain C region                    | 1.16         | 1.33                 |
| P01781                  | Ig heavy chain V-III                       | 1.03         | 1.18                 |
| P0DJI9                  | Serum amyloid A-2 protein                  | 0.96         | 1.10                 |
| P13671                  | Complement component C6                    | 0.92         | 1.06                 |
| F5GY80                  | Complement component C8 beta chain         | 0.87         | 1.00                 |
| P35542                  | Serum amyloid A-4 protein                  | 0.85         | 0.98                 |
| P04196                  | Histidine-rich glycoprotein                | 0.79         | 0.91                 |
| P13645                  | Keratin, type I cytoskeletal 10            | 0.72         | 0.83                 |
| G3V1N2                  | HCG1745306, isoform CRA_a                  | 0.66         | 0.76                 |
| P10643                  | Complement component C7                    | 0.65         | 0.75                 |
| P01765                  | Ig heavy chain V-III region TIL            | 0.63         | 0.72                 |
| P35908                  | Keratin, type II cytoskeletal 2 epidermal  | 0.55         | 0.63                 |
| P01871-2                | Isoform 2 of Ig mu chain C region          | 0.53         | 0.61                 |
| Q96IY4                  | Carboxypeptidase B2                        | 0.48         | 0.55                 |
| G3V2M1                  | Plasma serine protease inhibitor           | 0.44         | 0.51                 |
| P01859                  | Ig gamma-2 chain C region                  | 0.42         | 0.48                 |
| P10124                  | Serglycin                                  | 0.42         | 0.48                 |
| P12259                  | Coagulation factor V                       | 0.41         | 0.47                 |
| P07357                  | Complement component C8 alpha chain        | 0.4          | 0.46                 |
| E7EPG1                  | Multimerin-1                               | 0.37         | 0.43                 |
| P06396                  | Gelsolin                                   | 0.35         | 0.40                 |
| P01008                  | Antithrombin-III                           | 0.35         | 0.40                 |
| P18428                  | Lipopolysaccharide-binding protein         | 0.35         | 0.40                 |
| H0YIN9                  | Keratin, type II cytoskeletal 5            | 0.33         | 0.38                 |
| E7EQ48                  | Proteoglycan 4                             | 0.32         | 0.37                 |

|          |                                                          |      |      |
|----------|----------------------------------------------------------|------|------|
| A0M8Q6   | Ig lambda-7 chain C region                               | 0.3  | 0.35 |
| P02763   | Alpha-1-acid glycoprotein 1                              | 0.3  | 0.35 |
| P01593   | Ig kappa chain V-I region AG                             | 0.28 | 0.32 |
| P01614   | Ig kappa chain V-II region Cum                           | 0.27 | 0.31 |
| P08697   | Alpha-2-antiplasmin                                      | 0.26 | 0.30 |
| P01042   | Kininogen-1                                              | 0.25 | 0.29 |
| B4E1Z4   | Complement factor B                                      | 0.23 | 0.26 |
| B7Z8R6   | Trypstatin                                               | 0.23 | 0.26 |
| J3KN47   | Serotransferrin                                          | 0.22 | 0.25 |
| B1AKG0   | Complement factor H-related 1                            | 0.22 | 0.25 |
| P24593   | Insulin-like growth factor-binding protein 5             | 0.22 | 0.25 |
| J3KMX7   | Matrix Gla protein                                       | 0.22 | 0.25 |
| F5GXS5   | Apolipoprotein F                                         | 0.21 | 0.24 |
| P02766   | Transthyretin                                            | 0.21 | 0.24 |
| P08603   | Complement factor H                                      | 0.2  | 0.23 |
| Q5VYL6   | Complement factor H-related 5                            | 0.2  | 0.23 |
| P03950   | Angiogenin                                               | 0.2  | 0.23 |
| D6REX5   | Selenoprotein P (Fragment)                               | 0.19 | 0.22 |
| P10646   | Tissue factor pathway inhibitor                          | 0.19 | 0.22 |
| D6RAQ1   | Heparanase 8 kDa subunit                                 | 0.18 | 0.21 |
| C9JV77   | Alpha-2-HS-glycoprotein                                  | 0.17 | 0.20 |
| Q53RD9-2 | Isoform 2 of fibulin-7                                   | 0.15 | 0.17 |
| P01137   | Transforming growth factor beta-1                        | 0.15 | 0.17 |
| P02790   | Hemopexin                                                | 0.13 | 0.15 |
| P00742   | Coagulation factor X                                     | 0.12 | 0.14 |
| P04259   | Keratin, type II cytoskeletal 6B                         | 0.11 | 0.13 |
| G8JL88   | Apolipoprotein L1                                        | 0.11 | 0.13 |
| G8JLA8   | Transforming growth factor-beta-induced protein ig-h3    | 0.09 | 0.10 |
| P01876   | Ig alpha-1 chain C region                                | 0.09 | 0.10 |
| P09871   | Complement C1s subcomponent                              | 0.09 | 0.10 |
| P01023   | Alpha-2-macroglobulin                                    | 0.08 | 0.09 |
| Q0VAC5   | HP protein                                               | 0.08 | 0.09 |
| P27918   | Properdin                                                | 0.06 | 0.07 |
| E7EV71   | Latent-transforming growth factor beta-binding protein 1 | 0.06 | 0.07 |
| E7EQB2   | Lactoferrin-C                                            | 0.04 | 0.05 |
| Q5T985   | Inter-alpha (Globulin) inhibitor H2                      | 0.03 | 0.03 |

The absolute protein abundance in proteomics was estimated with the Exponentially Modified Protein Abundance Index through HCD fragmentation. Protein abundance (mol %) =  $\text{emPAI} / \sum(\text{emPAI}) \times 100$ . Protein score 50 was taken as the identity threshold as the confidence level is higher than 95%

**Table S4.** List of proteins detected in the corona on the glucose-containing glycopolymer layer with grafting density 0.034 chains/nm<sup>2</sup>

| Accession number | Protein                                    | emPAI | Abundance (%) |
|------------------|--------------------------------------------|-------|---------------|
| P01024           | Complement C3                              | 14.04 | 15.28         |
| P02647           | Apolipoprotein A-I                         | 13.43 | 14.61         |
| P02649           | Apolipoprotein E                           | 10.54 | 11.47         |
| P02654           | Apolipoprotein C-I                         | 5.72  | 6.22          |
| P02768           | Serum albumin                              | 3.23  | 3.51          |
| P06727           | Apolipoprotein A-IV                        | 3.07  | 3.34          |
| P07360           | Complement component C8 gamma chain        | 3.03  | 3.30          |
| P02748           | Complement component C9                    | 3.01  | 3.28          |
| P10909-2         | Isoform 2 of Clusterin                     | 2.52  | 2.74          |
| P04264           | Keratin, type II cytoskeletal 1            | 2.05  | 2.23          |
| P0CG05           | Ig lambda-2 chain C regions                | 1.87  | 2.03          |
| P35527           | Keratin, type I cytoskeletal 9             | 1.8   | 1.96          |
| P01834           | Ig kappa chain C region                    | 1.79  | 1.95          |
| B0YIW2           | Apolipoprotein C-III                       | 1.57  | 1.71          |
| P04004           | Vitronectin                                | 1.53  | 1.66          |
| P01031           | Complement C5                              | 1.47  | 1.60          |
| P0DJ18           | Serum amyloid A-1 protein                  | 1.46  | 1.59          |
| P00734           | Prothrombin                                | 1.24  | 1.35          |
| P02655           | Apolipoprotein C-II                        | 1.22  | 1.33          |
| P35908           | Keratin, type II cytoskeletal 2 epidermal  | 1.18  | 1.28          |
| P13671           | Complement component C6                    | 0.98  | 1.07          |
| Q99969           | Retinoic acid receptor responder protein 2 | 0.92  | 1.00          |
| F5GY80           | Complement component C8 beta chain         | 0.87  | 0.95          |
| P13645           | Keratin, type I cytoskeletal 10            | 0.82  | 0.89          |
| P10643           | Complement component C7                    | 0.7   | 0.76          |
| P02652           | Apolipoprotein A-II                        | 0.7   | 0.76          |
| P01857           | Ig gamma-1 chain C region                  | 0.68  | 0.74          |
| G3V1N2           | HCG1745306, isoform CRA_a                  | 0.66  | 0.72          |
| P01766           | Ig heavy chain V-III region BRO            | 0.58  | 0.63          |
| P0DJ19           | Serum amyloid A-2 protein                  | 0.57  | 0.62          |
| P01008           | Antithrombin-III                           | 0.52  | 0.57          |
| P02766           | Transthyretin                              | 0.47  | 0.51          |
| P06396           | Gelsolin                                   | 0.45  | 0.49          |
| P02533           | Keratin, type I cytoskeletal 14            | 0.36  | 0.39          |
| P07357           | Complement component C8 alpha chain        | 0.33  | 0.36          |
| C9JEX1           | Kininogen-1                                | 0.33  | 0.36          |
| P12259           | Coagulation factor V                       | 0.31  | 0.34          |
| P01859           | Ig gamma-2 chain C region                  | 0.3   | 0.33          |
| Q96IY4           | Carboxypeptidase B2                        | 0.3   | 0.33          |
| P19652           | Alpha-1-acid glycoprotein 2                | 0.3   | 0.33          |
| P13647           | Keratin, type II cytoskeletal 5            | 0.29  | 0.32          |
| P01620           | Ig kappa chain V-III region SIE            | 0.29  | 0.32          |
| Q13103           | Secreted phosphoprotein 24                 | 0.29  | 0.32          |
| P01871-2         | Isoform 2 of Ig mu chain C region          | 0.28  | 0.30          |
| J3KN47           | Serotransferrin                            | 0.28  | 0.30          |
| C9JV77           | Alpha-2-HS-glycoprotein                    | 0.27  | 0.29          |

|        |                                     |      |      |
|--------|-------------------------------------|------|------|
| D6RAK8 | Vitamin D-binding protein           | 0.25 | 0.27 |
| G5E9R0 | Actin                               | 0.25 | 0.27 |
| P02538 | Keratin, type II cytoskeletal 6A    | 0.24 | 0.26 |
| E7EPG1 | Multimerin-1                        | 0.22 | 0.24 |
| B1AKG0 | Complement factor H-related 1       | 0.22 | 0.24 |
| B4E1Z4 | Complement factor B                 | 0.2  | 0.22 |
| P02790 | Hemopexin                           | 0.2  | 0.22 |
| F8VXB4 | Keratin, type II cytoskeletal 8     | 0.18 | 0.20 |
| P01876 | Ig alpha-1 chain C region           | 0.18 | 0.20 |
| P08603 | Complement factor H                 | 0.14 | 0.15 |
| C9JF17 | Apolipoprotein D                    | 0.14 | 0.15 |
| P02763 | Alpha-1-acid glycoprotein 1         | 0.14 | 0.15 |
| P27918 | Properdin                           | 0.13 | 0.14 |
| E7EQ48 | Proteoglycan 4                      | 0.13 | 0.14 |
| P06858 | Lipoprotein lipase                  | 0.13 | 0.14 |
| P08697 | Alpha-2-antiplasmin                 | 0.12 | 0.13 |
| B0UZ83 | Complement C4 gamma chain           | 0.11 | 0.12 |
| P01023 | Alpha-2-macroglobulin               | 0.1  | 0.11 |
| Q5T985 | Inter-alpha (Globulin) inhibitor H2 | 0.1  | 0.11 |
| Q5VYL6 | Complement factor H-related 5       | 0.1  | 0.11 |

The absolute protein abundance in proteomics was estimated with the Exponentially Modified Protein Abundance Index through HCD fragmentation. Protein abundance (mol %) =  $\text{emPAI} / \sum(\text{emPAI}) \times 100$ . Protein score 50 was taken as the identity threshold as the confidence level is higher than 95%.

**Table S5.** Adsorbed HSA and C3-dep serum concentration onto galactose nanoparticles with different grafting density prepared from 669 nm PS particles.

| Samples       | Grafting density<br>(chains/nm <sup>2</sup> ) | Complement consumption<br>by CH50 assay | Non-specific protein adsorption    |                                             |
|---------------|-----------------------------------------------|-----------------------------------------|------------------------------------|---------------------------------------------|
|               |                                               |                                         | Adsorbed HSA concentration (mg/mL) | Adsorbed C3-dep serum concentration (mg/mL) |
| Galactose NP1 | 0.11                                          | 100.07 ± 0.24                           | 0.11 ± 0.01                        | 0.11 ± 0.02                                 |
| Galactose NP3 | 0.064                                         | 82.73 ± 10.22                           | 0.14 ± 0.03                        | 0.17 ± 0.02                                 |
| Galactose NP5 | 0.023                                         | 13.57 ± 5.55                            | 0.17 ± 0.02                        | 0.18 ± 0.01                                 |
| PS            | 0                                             | 8 ± 2.5                                 | 0.29 ± 0.02                        | 0.27 ± 0.03                                 |

Nanoparticle suspension (20 uL, 50 cm<sup>2</sup>) was incubated with C3-depleted serum (180 uL) or HSA solution (180 uL, 40 mg/mL) at 37 °C for 1h. Then the particles were washed by PBS buffer solution twice (200 uL each). The adsorbed proteins were eluted from the surface by boiled at 90 °C with 2% SDS (100 uL) for 10 minutes. The eluted samples were then centrifuged, and the supernatants were collected. The protein concentration in the supernatant was analyzed by NanoDrop 1000 Spectrophotometer through the measurement of adsorption at 280 nm.

**Table S6.** Ions scores of proteins identified by quantification MS run (between galactose polymer with different grafting density).

| Threshold value of Individual ions scores for the quantification MS run (between galactose polymer with different grafting density): 37 |       |
|-----------------------------------------------------------------------------------------------------------------------------------------|-------|
| Protein                                                                                                                                 | Score |
| Complement C3                                                                                                                           | 8502  |
| Complement C5                                                                                                                           | 962   |
| Complement C6                                                                                                                           | 526   |
| Complement C7                                                                                                                           | 722   |
| Complement C8                                                                                                                           | 225   |
| Complement C9                                                                                                                           | 1042  |
| Factor B                                                                                                                                | 185   |
| Factor H                                                                                                                                | 120   |

**Table S7.** Ions scores of proteins identified by quantification MS run (between galactose and glucose nanoparticle with similar grafting density).

| Threshold value of Individual ions scores for the quantification MS run (between galactose and glucose nanoparticle with similar grafting density): 37 |       |
|--------------------------------------------------------------------------------------------------------------------------------------------------------|-------|
| Protein                                                                                                                                                | Score |
| Complement C3                                                                                                                                          | 8348  |
| Complement C5                                                                                                                                          | 849   |
| Complement C6                                                                                                                                          | 298   |
| Complement C7                                                                                                                                          | 563   |
| Complement C8                                                                                                                                          | 286   |
| Complement C9                                                                                                                                          | 898   |
| Factor B                                                                                                                                               | 129   |
| Factor H                                                                                                                                               | 82    |

## References

1. Arima, Y.; Kawagoe, M.; Toda, M.; Iwata, H. Complement Activation by Polymers Carrying Hydroxyl Groups. *ACS Appl. Mater. Interfaces* **2009**, *1*, 2400-2407.
